# Supplementary material for: The components of Huang-Lian-Jie-Du-Decoction act synergistically to exert protective effects in a rat ischemic stroke model
Source: PubMed Central journal article supplement (PMC5348361; doi:10.18632/oncotarget.12645), 2016-10-13
Supplement: oncotarget-07-80872-s001.pdf [file oncotarget-07-80872-s001.pdf]

## The components of Huang-Lian-Jie-Du-Decoction act synergistically to exert protective effects in a rat ischemic stroke model

### SUPPLEMENTARY FIGURES AND TABLES

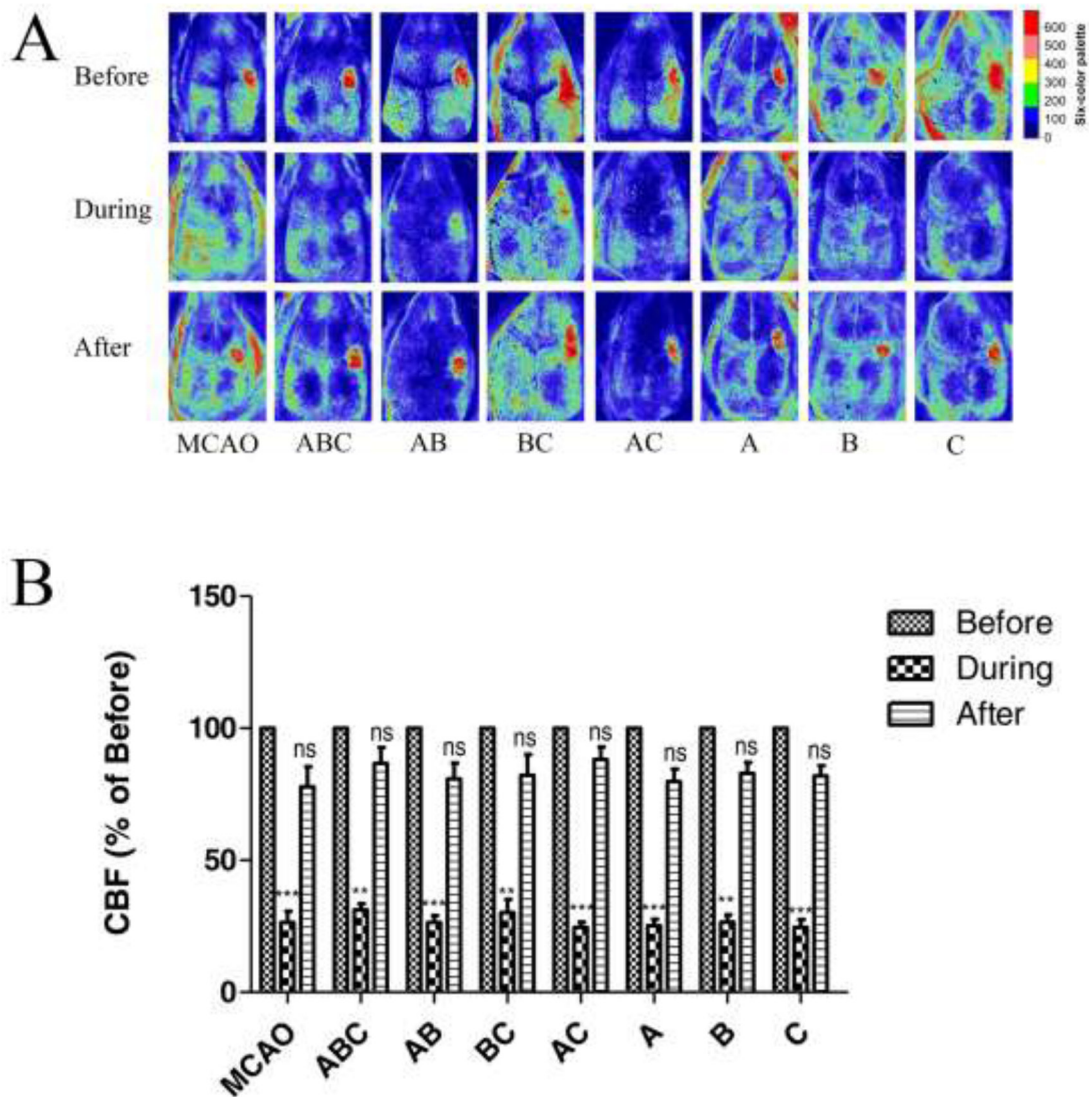

**Supplementary Figure S1:** A. The representative images of regional cerebral blood flow (rCBF) of ipsilateral cortex in model rats before, during and after ischemia, each column representing a rat. The magnitude of rCBF is denoted by different colors, from blueish to redish representing ascending values of rCBF. B. Quantitative analysis of rCBF in different groups. Data are expressed as mean  $\pm$  SD, n=6. \* P<0.05 vs pre-ischemia levels, \*\* P<0.01 vs pre-ischemia levels, \*\*\* P<0.001 vs pre-ischemia levels.

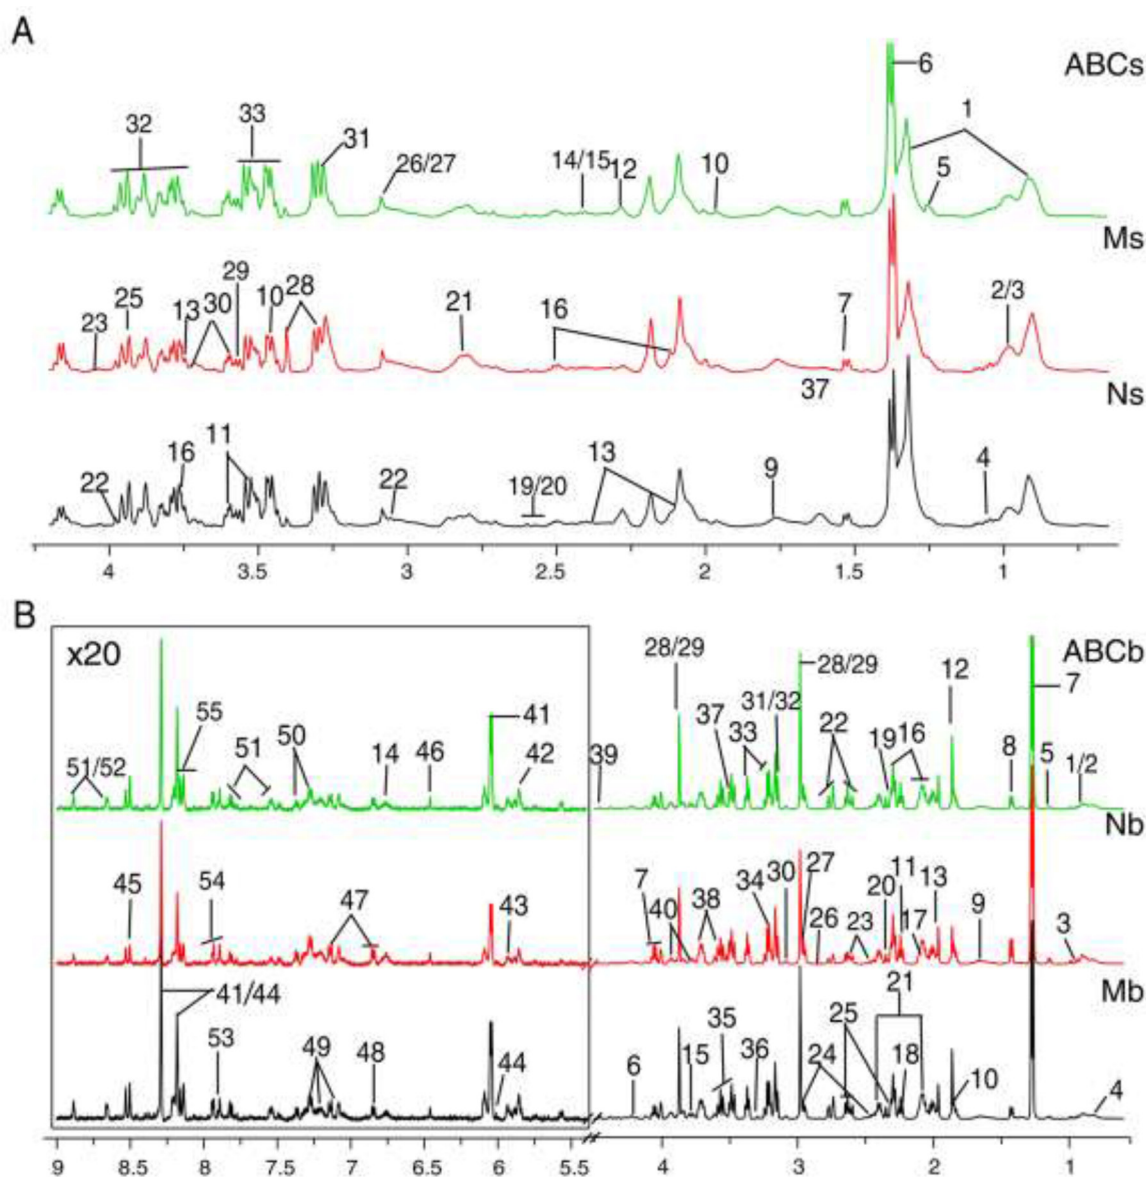

**Supplementary Figure S2:** Typical 500 MHz  $^1\text{H}$  NMR spectra of serum **A.** and cerebrum **B.** obtained from the sham, the MCAO and the ABC-treated groups. Metabolites in serum: 1, Low density lipoprotein/very low density lipoprotein (LDL/VLDL); 2, Valine (Val); 3, Leucine (Leu); 4, Isoleucine (Ile); 5,  $\beta$ -Hydroxybutyrate (3-HB); 6, Lactate (Lac); 7, Alanine (Ala); 8, Lysine (Lys); 9, Arginine (Arg); 10, Myo-Inositol (Myo); 11, Acetoacetate (Acet); 12, Glutamate (Glu); 13, Pyruvate (Pyr); 14, Succinate (Suc); 15, Glutamine (Gln); 16, Citrate (Cit); 17, Isocitrate (Isoc); 18, Nicotinamide adenine dinucleotide phosphate (NADPH); 19, Cystine (Cys); 20, Creatinine (Cre); 21, Creatine (Cr); 22, Phosphocreatine (PCr); 23, Trimethylamine oxide (TMAO); 24, Taurine (Tau); 25, Glycine (Gly); 26, Glycerol (Gyo); 27, Betaine (Bet); 28,  $\alpha$ -Glucose ( $\alpha$ -Glc); 29,  $\beta$ -Glucose ( $\beta$ -Glc). Metabolites in cerebrum tissue: 1, Isoleucine (Ile); 2, Leucine (Leu); 3, Valine (Val); 4, 2-Hydroxybutyrate (2-HB); 5,  $\beta$ -Hydroxybutyrate (3-HB); 6, Threonine (Thr); 7, Lactate (Lac); 8, Alanine (Ala); 9, Lysine (Lys); 10, Arginine (Arg); 11,  $\gamma$ -amino-butyrate (GABA); 12, Acetate (AC); 13, N-acetyl-aspartic acid (NAA); 13, N-acetyl-glutamate (NAG); 15, Methionine (Met); 16, Glutamate (Glu); 17, Glutathione (GSH); 18, Acetoacetate (Ace); 19, Pyruvate (Pyr); 20, Succinate (Suc); 21, Glutamine (Gln); 22, Aspartate (Asp); 23, Citrate (Cit); 24, Isocitrate (Isoc); 25, Malate (Mal); 26, Trimethylamine (TMA); 27, Creatinine (Cre); 28, Creatine (Cr); 29, Phosphocreatine (PCr); 30, Ethanolamine (ETA); 31, choline (Cho); 32, O-phosphocholine (OPC); 33, Taurine (Tau); 34, Betaine (Bet); 35, Myo-inositol (Myo); 36, Methanol (MeOH); 37, Glycine (Gly); 38, Glycerol (Gyo); 39, Ascorbate (Asc); 40, Serine (Ser); 41, Inosine (Ino); 42, Uracil (Ura); 43, Uridine (UDP); 44, Adenosine (Ade); 45, Adenosine monophosphate monophosphate (AMP); 46, Fumarate (Fum); 47, Tyrosine (Tyr); 48, Histidine (His); 49, Tryptophan (Trp); 50, Phenylalanine (Phe); 51, Nicotinamide (Nict); 52, Nicorinurate (Nict); 53, Xanthine (Xan); 54, 3-Methylxanthine (3-MX); 55, Hypoxanthine (Hyp).

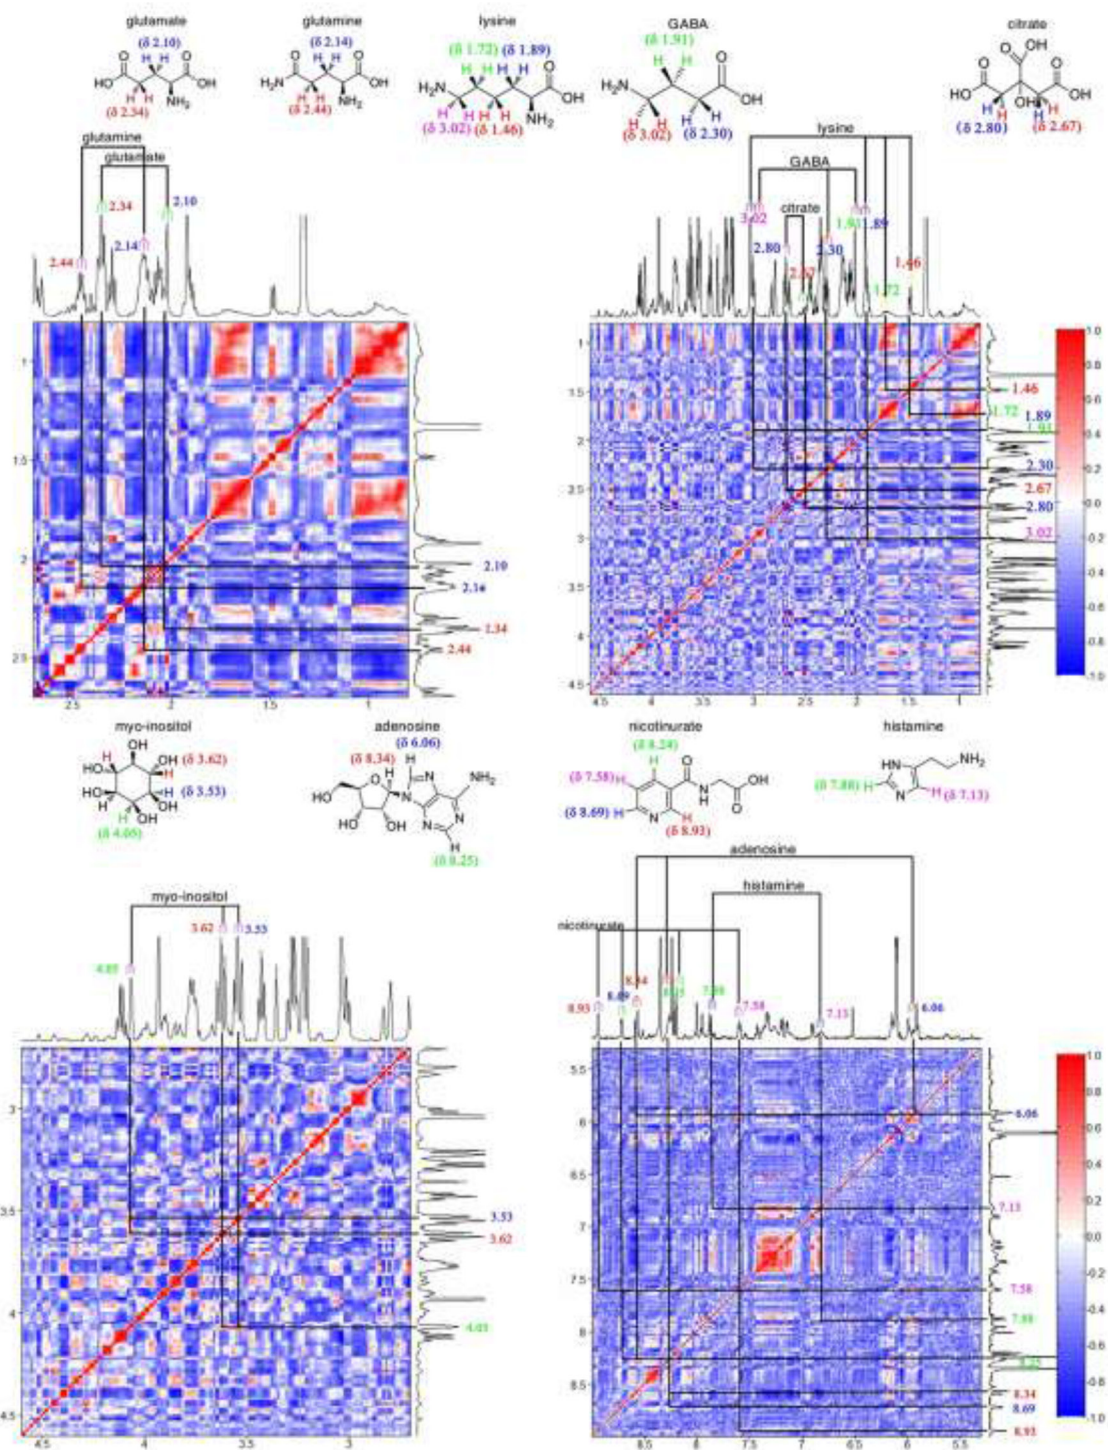

**Supplementary Figure S3: Two-dimensional STOCYSY image plots with assignment examples of some metabolites.** The degree of correlation across the spectrum has been color coded and projected on the spectrum.



**Supplementary Table S1: The synergistic experimental design of the HLJDD**

| Group | Berberine (mg/kg) | Baicalin (mg/kg) | Jasminoidin (mg/kg) | Dose (mg/kg) |
|-------|-------------------|------------------|---------------------|--------------|
| ABC   | 8.6               | 6.8              | 4.6                 | 20           |
| A     | 20                |                  |                     | 20           |
| B     |                   | 20               |                     | 20           |
| C     |                   |                  | 20                  | 20           |
| AB    | 11.1              | 8.9              |                     | 20           |
| AC    | 13                |                  | 7                   | 20           |
| BC    |                   | 11.9             | 8.1                 | 20           |

**Supplementary Table S2: The assignment of metabolites in cerebrum of N, M and ABC rats.**

See Supplementary File 1

**Supplementary Table S3: The assignment of metabolites in serum of N, M and ABC rats.**

See Supplementary File 2

**Supplementary Table S4: Primers used for real-time PCR assays performed on the LC480 system**

| Genes     | Forward primer (5'-3')   | Reverse primer (5'-3') |
|-----------|--------------------------|------------------------|
| NADPH     | TGGCCAACGAAGGGGTAAA      | CACTGAGAAGTTCAGGGCGT   |
| GSS       | ACAACGAGCGAGTTGGGAT      | TGAGGGGAAGAGCGTGAATG   |
| HO-1      | TGCACATCCGTGCAGAGAAT     | CTGGGTTCTGCTTGTTTCGC   |
| Nrf2      | CATTTGTAGATGACCATGAGTCGC | GCCAAACTTGCTCCATGTCC   |
| Bcl-2     | TTTCTCTTTTCGGCCGTGG      | TATCCCACTCGTAGCCCCTC   |
| Caspase 3 | GGAGCTTGGAACGCGAAGA      | ACACAAGCCCATTCAGGGT    |
| Bax       | AGGACGCATCCACCAAGAAG     | CAGTTGAAGTTGCCGTCTGC   |

NADPH: nicotinamide adenine dinucleotide phosphate; GSS: glutathione synthase
